# Supplementary material for: Development of Chitosan/Bacterial Cellulose Composite Films Containing Nanodiamonds as a Potential Flexible Platform for Wound Dressing
Source: Materials (Basel). 2015 Sep 18;8(9):6401–18. doi: 10.3390/ma8095309 (PMC5512916; doi:10.3390/ma8095309)
Supplement: Supplementary file 1 [file materials-08-05309-s001.pdf]

# Supplementary Materials

## *Estimation of Upper and Lower Bands of Elastic Modulus in Composites*

In order to better understand the enhancement effects of nanodiamond articles on the elastic modulus, the model of Hashin and Shtrikman [51] can be used:

$$K_{\text{com}}^{\text{upper}} = K_f + (1 - \varphi_f) \left[ \frac{1}{K_m - K_f} + \frac{3\varphi_f}{3K_f + 4G_f} \right]^{-1} \quad (\text{S1})$$

$$K_{\text{com}}^{\text{lower}} = K_m + \varphi_f \left[ \frac{1}{K_f - K_m} + \frac{3(1 - \varphi_f)}{3K_m + 4G_m} \right]^{-1} \quad (\text{S2})$$

$$G_{\text{com}}^{\text{upper}} = G_f + (1 - \varphi_f) \left[ \frac{1}{G_m - G_f} + \frac{6\varphi_f(K_f + 2G_f)}{5G_f(3K_f + 4G_f)} \right]^{-1} \quad (\text{S3})$$

$$G_{\text{com}}^{\text{lower}} = G_m + \varphi_f \left[ \frac{1}{G_f - G_m} + \frac{6(1 - \varphi_f)(K_m + 2G_m)}{5G_m(3K_m + 4G_m)} \right]^{-1} \quad (\text{S4})$$

$$E_{\text{com}}^{\text{upper}} = \frac{9K_{\text{com}}^{\text{upper}}}{1 + 3K_{\text{com}}^{\text{upper}}/G_{\text{com}}^{\text{upper}}} \quad (\text{S5})$$

$$E_{\text{com}}^{\text{lower}} = \frac{9K_{\text{com}}^{\text{lower}}}{1 + 3K_{\text{com}}^{\text{lower}}/G_{\text{com}}^{\text{lower}}} \quad (\text{S6})$$

where  $E_{\text{com}}$  is the elastic modulus of the composite and  $\varphi_f$  the volume fraction of the filler.  $K_f$ ,  $K_m$ ,  $G_f$  and  $G_m$  are the bulk and shear modulus of the filler and matrix, respectively. Under the assumption that both matrix and filler are isotropic, the following equations are applicable [2]:

$$K_i = \frac{E_i}{3(1 - 2\nu_i)} \quad (\text{S7})$$

$$G_i = \frac{E_i}{2(1 + \nu_i)} \quad (\text{S8})$$

where  $\nu_i$  is the Poisson's ratio of the filler and/or matrix. The elastic modulus of ND is 967 GPa and its Poisson's ratio is 0.07 [49].
